# Supplementary material for: Photothermal Effects and Heat Conduction in Nanogranular Silicon Films
Source: MDPI journal article supplement (doi:10.3390/nano11092379), 2021-09-13
Supplement: s1 [file s1]

# Photothermal Effects and Heat Conduction in Nanogranular Silicon Films

Bayan A. Kurbanova <sup>1</sup>, Gauhar K. Mussabek <sup>2,3</sup>, Viktor Y. Timoshenko <sup>3,4,5</sup>, Vladimir Lysenko <sup>3,6</sup> and Zhandos N. Utegulov <sup>1,\*</sup>

<sup>1</sup> Department of Physics, School of Sciences and Humanities, Nazarbayev University, Nur-Sultan 010000, Kazakhstan; [baran.kurbanova@nu.edu.kz](mailto:baran.kurbanova@nu.edu.kz), [zhutegulov@nu.edu.kz](mailto:zhutegulov@nu.edu.kz)

<sup>2</sup> Faculty of Physics and Technology, Al-Farabi Kazakh National University, Almaty 050040, Kazakhstan; [gauhar.musabek@kaznu.kz](mailto:gauhar.musabek@kaznu.kz)

<sup>3</sup> Laboratory “Nanotheranostics”, Institute of Engineering Physics for Biomedicine, National Research Nuclear University “MEPhI”, 115409 Moscow, Russia; [victor\\_timoshenk@mail.ru](mailto:victor_timoshenk@mail.ru) (V.Y.T.); [vladimir.lysenko@univ-lyon1.fr](mailto:vladimir.lysenko@univ-lyon1.fr) (V.L.)

<sup>4</sup> Faculty of Physics, Lomonosov Moscow State University, 119911 Moscow, Russia

<sup>5</sup> Lebedev Physical Institute of RAS, 119911 Moscow, Russia

<sup>6</sup> Light Matter Institute, UMR-5306, Claude Bernard University of Lyon, 2 rue Victor Grignard, 69622 Villeurbanne, France

\* Correspondence: [zhutegulov@nu.edu.kz](mailto:zhutegulov@nu.edu.kz)

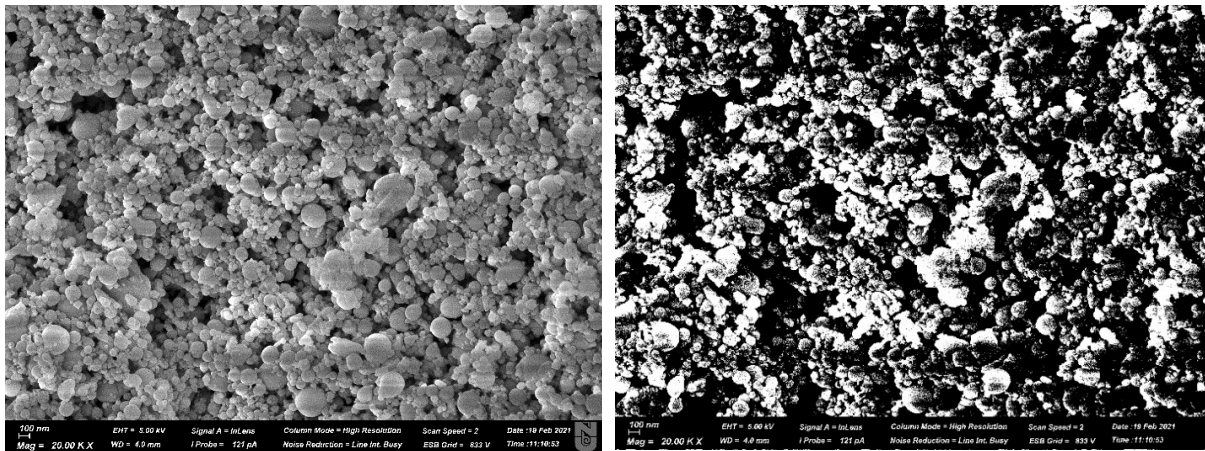

**Figure S1.** SEM images before (left) and after (right) ImageJ processing for porosity estimation.

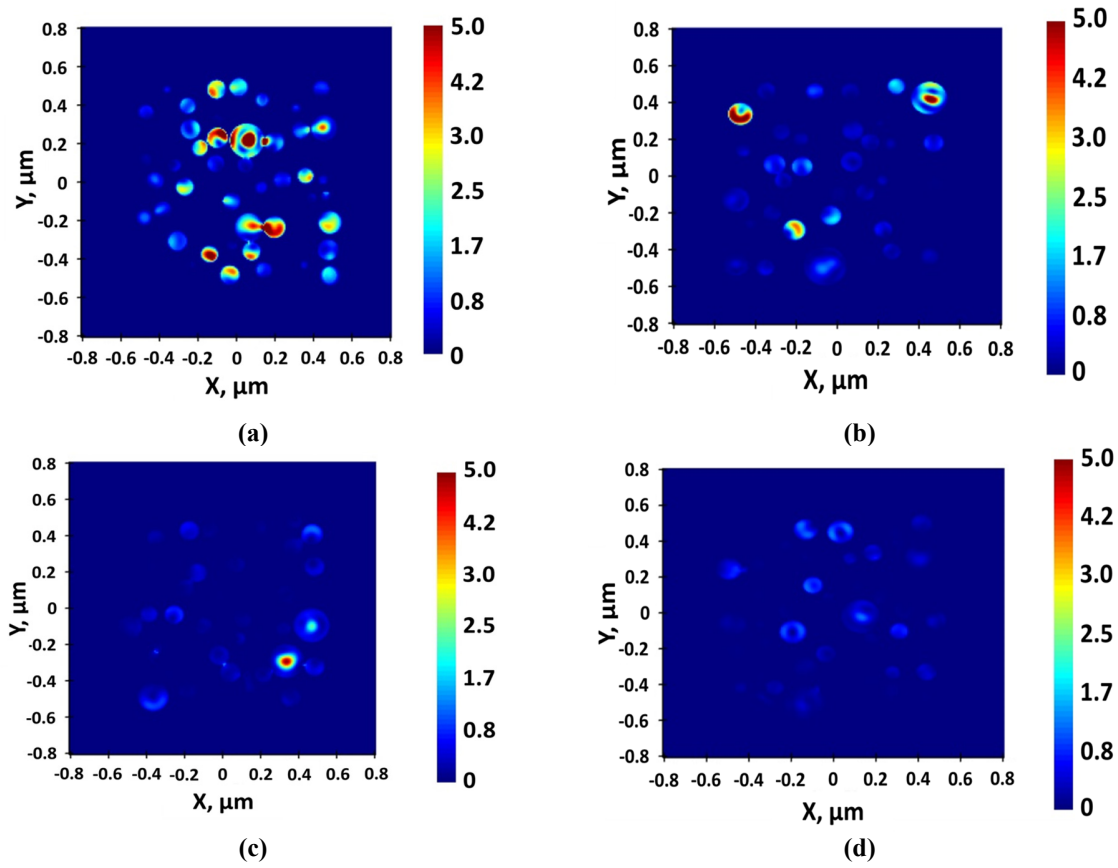

**Figure S2.** Maps of the absorbed power density (in  $\text{W/m}^3, \times 10^{15}$ ) at different depths ( $z$ ) of 4  $\mu\text{m}$  thick porous Si NPs film on 4  $\mu\text{m}$  thick glass substrate: (a)  $z = 0.1 \mu\text{m}$ , (b)  $z = 1 \mu\text{m}$ , (c)  $z = 2 \mu\text{m}$ , (d)  $z = 3 \mu\text{m}$ .

**Table S1.** Room temperature thermal conductivity values of various *nanostructurely voided Si*.

Photoacoustic method = PA, Phonon hydrodynamics calculations = PH, Monte Carlo simulation = MC, Volkein's DC method = VDC; Optical pump-probe technique = OPP; Lock-in thermography = LT; Scanning thermal microscopy = SThM; Molecular Dynamics Simulation = MD; Finite element mesh = FEM; Electrothermal response = ETR; Laser flash method = LF; Born-von Karman model = BK; Effective medium model = EM; Electron beam heating method = EBH; Two-laser Raman thermography = TLRT;

| Porous Si layer thickness (micron) | Porosity, % | Thermal conductivity (W/m K) | Measurement/calculation technique | Sample description                                | Reference |
|------------------------------------|-------------|------------------------------|-----------------------------------|---------------------------------------------------|-----------|
| <b>Porous Si</b>                   |             |                              |                                   |                                                   |           |
| 10                                 | 50          | 3.9                          | PA                                | c-Por-Si, p <sup>+</sup> type, anodization-etched | [34]      |
| 23                                 | 60          | 2.5                          | PA                                | c-Por-Si, p <sup>+</sup> type, anodization-etched | [34]      |

|      |      |      |           |                                                                        |      |
|------|------|------|-----------|------------------------------------------------------------------------|------|
| 75   | 40   | 31.2 | PA        | c-Por-Si, n- type, electrochemical anodic-etched                       | [34] |
| 180  | 40   | 31.2 | PA        | c-Por-Si, n- type, d = 200-500 nm, electrochemical anodic-etched       | [34] |
| 100  | 66   | 3.3  | $3\omega$ | c-Por-Si, n type, d = 47nm(pore diameter), electrochemical etched      | [29] |
| 100  | 43   | 3.7  | $3\omega$ | c-Por-Si, n type, d=27nm(pore diameter), electrochemical etched        | [29] |
| 100  | 40   | 5.5  | $3\omega$ | c-Por-Si, n type, d=35nm(pore diameter), electrochemical etched        | [29] |
| 100  | 33   | 5    | $3\omega$ | c-Por-Si, n type, d=32nm(pore diameter), electrochemical etched        | [29] |
| 100  | 17   | 13.7 | $3\omega$ | c-Por-Si, n type, d=64nm(pore diameter), electrochemical etched        | [29] |
| 100  | 60   | 17.6 | $3\omega$ | c-Por-Si, n type, d=235nm(pore diameter), electrochemical etched       | [29] |
| 100  | 42   | 24   | $3\omega$ | c-Por-Si, n type, electrochemical etched                               | [29] |
| -    | 40   | 1    | PH        | c-Por-Si                                                               | [44] |
| 75   | 40   | 29.6 | PH        | c-Por-Si, p+ type, anodization-etched                                  | [44] |
| 10   | 50   | 5.9  | PH        | c-Por-Si, p+ type, anodization-etched                                  | [44] |
| 23   | 60   | 4    | PH        | c-Por-Si, p+ type, anodization-etched                                  | [44] |
| 31   | 64   | 0.29 | PH        | c-Por-Si, p-type, boron-doped, electrochemical etched                  | [44] |
| 46   | 71   | 0.16 | PH        | c-Por-Si, p-type, boron-doped, electrochemical etched                  | [44] |
| 31   | 79   | 0.10 | PH        | c-Por-Si, p-type, boron-doped, electrochemical etched                  | [44] |
| 31   | 89   | 0.02 | PH        | c-Por-Si, p-type, boron-doped, electrochemical etched                  | [44] |
| 0.25 | 15.9 | 21.9 | TLRT      | c-Si membrane, d = 135 nm(pore diameter)                               | [58] |
| 0.25 | 24.6 | 8.5  | TLRT      | c-Si membrane,d = 135 nm(pore diameter)                                | [58] |
| 0.25 | 33.2 | 3.9  | TLRT      | c-Si membrane,d = 135 nm(pore diameter)                                | [58] |
| 310  | 71   | 0.15 | $3\omega$ | c-Por-Si, p-type, boron-doped, electrochemical etched, on si substrate | [37] |

|      |      |      |           |                                                                                            |      |
|------|------|------|-----------|--------------------------------------------------------------------------------------------|------|
| 46   | 71   | 0.15 | $3\omega$ | c-Por-Si, p-type, boron-doped, electrochemical etched, on si substrate                     | [37] |
| 31   | 64   | 0.20 | $3\omega$ | c-Por-Si, p-type, boron-doped, electrochemical etched, on si substrate                     | [37] |
| 31   | 79   | 0.04 | $3\omega$ | c-Por-Si, p-type, boron-doped, electrochemical etched, on si substrate                     | [37] |
| 31   | 89   | 0.03 | $3\omega$ | c-Por-Si, p <sup>+</sup> -type, high-doped, electrochemical etched, on si substrate        | [37] |
| 0.05 | 30   | 5.5  | MC        | c-Por-Si, p <sup>+</sup> type, electrochemical etched                                      | [45] |
| 0.15 | 30   | 5.6  | MC        | c-Por-Si, p <sup>+</sup> type, electrochemical etched                                      | [45] |
| 0.26 | 30   | 6.2  | MC        | c-Por-Si, p <sup>+</sup> type, electrochemical etched                                      | [45] |
| 0.5  | 30   | 6.4  | MC        | c-Por-Si, p <sup>+</sup> type, electrochemical etched                                      | [45] |
| 1    | 30   | 6.5  | MC        | c-Por-Si, p <sup>+</sup> type, electrochemical etched                                      | [45] |
| 45   | 40   | 2.93 | PA        | c-Por-Si, macro, micro, nano mixed porous, n type, el.etched                               | [30] |
| 60   | 57   | 1.03 | PA        | c-Por-Si, macro, micro, nano mixed porous, n type, el.etched                               | [30] |
| 40   | 72   | 0.29 | PA        | c-Por-Si, macro, micro, nano mixed porous, n type, el.etched                               | [30] |
| 4.84 | 0.23 | 0.55 | VDC       | d = 10.9(pore diameter), n type PS                                                         | [46] |
| 4.45 | 0.23 | 0.55 | VDC       | d = 10.9(pore diameter), n type PS                                                         | [46] |
| 4.49 | 0.26 | 0.39 | VDC       | d = 2.3(pore diameter), n type PS                                                          | [46] |
| 4.57 | 0.26 | 0.4  | VDC       | d = 2.3(pore diameter), n type PS                                                          | [46] |
| 23   | 60   | 6.1  | PH        | R = 10(pore radius), c-Por-Si, p <sup>+</sup> type, anodization-etched                     | [47] |
| 31   | 64   | 2.17 | PH        | R = 2(pore radius), c-Por-Si, p-type, boron-doped, electrochemical etched, on si substrate | [47] |
| 46   | 71   | 1.56 | PH        | R = 2(pore radius), c-Por-Si, p-type, boron-doped, electrochemical etched, on si substrate | [47] |
| 31   | 79   | 0.99 | PH        | R = 3(pore radius), c-Por-Si, p-type, boron-doped, electrochemical etched, on si substrate | [47] |
| 31   | 89   | 0.18 | PH        | R = 5(pore radius), c-Por-Si, p-type, boron-doped,                                         | [47] |

|         |      |         |      |                                                             |      |
|---------|------|---------|------|-------------------------------------------------------------|------|
|         |      |         |      | electrochemical etched, on si substrate                     |      |
| 19      | 61   | 0.15    | OPP  | c-Por-Si, p type, electrochemical etched                    | [39] |
| 27      | 66   | 0.13    | OPP  | c-Por-Si, p type, electrochemical etched                    | [39] |
| 38      | 73   | 0.17    | OPP  | c-Por-Si, p type, electrochemical etched                    | [39] |
| 3.2     | 27.5 | 20.8    | LT   | c-Por-Si, d=100nm, p-type, boron doped, etched-sintered     | [31] |
| 20.8    | 37.2 | 12.7    | LT   | c-Por-Si, d=100nm, p-type, boron doped, etched-sintered     | [31] |
| 20.7    | 44.2 | 11.3    | LT   | c-Por-Si, d=100nm, p-type, boron doped, etched-sintered     | [31] |
| 25.1    | 48.4 | 8.7     | LT   | c-Por-Si, d=100nm, p-type, boron doped, etched-sintered     | [31] |
| 26.8    | 51.7 | 6.1     | LT   | c-Por-Si, d=100nm, p-type, boron doped, etched-sintered     | [31] |
| 26.9    | 58.8 | 4.5     | LT   | c-Por-Si, d=100nm, p-type, boron doped, etched-sintered     | [31] |
| 25.5    | 66.2 | 2.3     | LT   | c-Por-Si, d=100nm, p-type, boron doped, etched-sintered     | [31] |
| 26      | 55   | 1.93    | PA   | c-Por-Si, p-type, nitrided, KOH etched                      | [32] |
| 26      | 55   | 1.12    | PA   | c-Por-Si, p-type, anodized, KOH etched                      | [32] |
| 26      | 75   | 0.74    | PA   | c-Por-Si, p-type, nitrided, KOH etched                      | [32] |
| 26      | 75   | 0.95    | PA   | c-Por-Si, p-type, anodized, KOH etched                      | [32] |
| 0.26076 | 80   | 0.95013 | SThM | c-Por-Si, p+-type, boron doped, electrochemical dissolution | [33] |
| 0.55281 | 80   | 1.23833 | SThM | c-Por-Si, p+-type, boron doped, electrochemical dissolution | [33] |
| 0.86159 | 80   | 1.55207 | SThM | c-Por-Si, p+-type, boron doped, electrochemical dissolution | [33] |
| 1.10155 | 80   | 1.40869 | SThM | c-Por-Si, p+-type, boron doped, electrochemical dissolution | [33] |
| 1.63169 | 80   | 1.61738 | SThM | c-Por-Si, p+-type, boron doped, electrochemical dissolution | [33] |
| 3.27791 | 80   | 1.43424 | SThM | c-Por-Si, p+-type, boron doped, electrochemical dissolution | [33] |
| 4.66557 | 80   | 1.49954 | SThM | c-Por-Si, p+-type, boron doped, electrochemical dissolution | [33] |
| 5.62541 | 80   | 1.47399 | SThM | c-Por-Si, p+-type, boron doped, electrochemical dissolution | [33] |

|         |    |         |       |                                                                                            |      |
|---------|----|---------|-------|--------------------------------------------------------------------------------------------|------|
| 0.26076 | 80 | 0.95013 | SThM  | c-Por-Si, p+-type, boron doped, electrochemical dissolution                                | [33] |
| 100     | 74 | 0.3     | Raman | c-Por-Si, p+-type, mesoporous, anodic dissolution process                                  | [35] |
| 0.054   | 15 | 3.91    | MD    | Bulk c-Si matrix, simulation cell length 24 – 136nm, D(pore) = 3nm, N(pore number) = 99    | [57] |
| 0.081   | 15 | 4.26    | MD    | Bulk c-Si matrix, simulation cell length 24 – 136nm, D(pore) = 3nm, N(pore number) = 153   | [57] |
| 0.1     | 15 | 4.67    | MD    | Bulk c-Si matrix, simulation cell length 24 – 136nm, D(pore) = 3nm, N(pore number) = 198   | [57] |
| 0.135   | 15 | 4.77    | MD    | Bulk c-Si matrix, simulation cell length 24 – 136nm, D(pore) = 3nm, N (pore number)= 252   | [57] |
| 0.054   | 25 | 2.12    | MD    | Bulk c-Si matrix, simulation cell length 24 – 136nm, D(pore) = 3.5nm, N(pore number) = 99  | [57] |
| 0.081   | 25 | 2.26    | MD    | Bulk c-Si matrix, simulation cell length 24 – 136nm, D(pore) = 3.5nm, N(pore number) = 153 | [57] |
| 0.1     | 25 | 2.37    | MD    | Bulk c-Si matrix, simulation cell length 24 – 136nm, D(pore) = 3.5nm, N(pore number) = 198 | [57] |
| 0.135   | 25 | 2.48    | MD    | Bulk c-Si matrix, simulation cell length 24 – 136nm, D(pore) = 3.5nm, N(pore number) = 252 | [57] |
| 0.054   | 35 | 1.09    | MD    | Bulk c-Si matrix, simulation cell length 24 – 136nm, D(pore) = 3.9nm, N(pore number) = 99  | [57] |
| 0.081   | 35 | 1.28    | MD    | Bulk c-Si matrix, simulation cell length 24 – 136nm, D(pore) = 3.9nm, N (pore number)= 153 | [57] |
| 0.1     | 35 | 1.20    | MD    | Bulk c-Si matrix, simulation cell length 24 – 136nm, D(pore) = 3.9nm, N(pore number) = 198 | [57] |
| 0.135   | 35 | 1.31    | MD    | Bulk c-Si matrix, simulation cell length 24 – 136nm, D(pore) = 3.9nm, N(pore number) = 252 | [57] |

|       |    |         |             |                                                                                            |      |
|-------|----|---------|-------------|--------------------------------------------------------------------------------------------|------|
| 0.054 | 45 | 0.65    | MD          | Bulk c-Si matrix, simulation cell length 24 – 136nm, D(pore) = 4.3nm, N(pore number) = 99  | [57] |
| 0.081 | 45 | 0.73    | MD          | Bulk c-Si matrix, simulation cell length 24 – 136nm, D(pore) = 4.3nm, N(pore number) = 153 | [57] |
| 0.1   | 45 | 0.70    | MD          | Bulk c-Si matrix, simulation cell length 24 – 136nm, D(pore) = 4.3nm, N(pore number) = 198 | [57] |
| 0.135 | 45 | 0.75    | MD          | Bulk c-Si matrix, simulation cell length 24 – 136nm, D(pore) = 4.3nm, N(pore number) = 252 | [57] |
| bulk  | 8  | 1.5     | MD          | 6x6x6 contained unit cell, side length 3.258nm, D(pore) = 1.74nm                           | [48] |
| bulk  | 15 | 2.5     | MD          | 6x6x6 contained unit cell, side length 3.258nm, D(pore) = 1.74nm D(pore) = 2.17nm          | [48] |
| bulk  | 27 | 4.5     | MD          | 6x6x6 contained unit cell, side length 3.258nm, D(pore) = 1.74nm D(pore) = 2.61nm          | [48] |
| bulk  | 38 | 9       | MD          | 6x6x6 contained unit cell, side length 3.258nm, D(pore) = 1.74nm D(pore) = 2.93nm          | [48] |
| 22    | 55 | 1.08    | $3\omega$   | c-Por-Si, p-type, electrochemical anodization                                              | [36] |
| 25    | 75 | 0.8     | SThM        | a-P0r-Si, p+-type, electrochemical etched                                                  | [51] |
| 100   | 72 | 0.5(3w) | $3\omega$   | c-Por-Si, p+-type, electrochemical etched                                                  | [40] |
| 48    | 41 | 5       | FEM, PT     | c-Por-Si, n-type, electrochemical etched                                                   | [41] |
| 10    | 56 | 1.2     | Raman, SThM | a-PSi, p+-type, electrochemical etched                                                     | [52] |
| 100   | 20 | 4.2     | ETR, FEM    | c-Por-Si, n-type, anodization                                                              | [42] |
| 50    | 45 | 2.3     | PA          | c-Por-Si, p-type, electrochemical etched                                                   | [53] |
| 50    | 55 | 1.8     | PA          | c-Por-Si, p-type, electrochemical etched                                                   | [53] |
| 50    | 65 | 1.4     | PA          | c-Por-Si, p-type, electrochemical etched                                                   | [53] |
| 26.6  | 23 | 1.2     | PA          | c-Por-Si, p-type, electrochemical anodic etched                                            | [38] |

|                      |         |      |                                     |                                                                           |      |
|----------------------|---------|------|-------------------------------------|---------------------------------------------------------------------------|------|
| 27.2                 | 37      | 0.3  | PA                                  | c-Por-Si, p-type, electrochemical anodic etched                           | [38] |
| 28.3                 | 52      | 0.25 | PA                                  | c-Por-Si, p-type, electrochemical anodic etched                           | [38] |
| 30                   | 61      | 0.2  | PA                                  | c-Por-Si, p-type, electrochemical anodic etched                           | [38] |
| <b>Si NP tablets</b> |         |      |                                     |                                                                           |      |
| bulk                 | 30      | 1.5  | LF                                  | c-Si NP, $D_{NP} = 5.6\text{nm}$ , Spark plasma sintered                  | [24] |
| bulk                 | 30      | 2    | LF                                  | c-Si NP, $D_{NP} = 60\text{nm}$ , Spark plasma sintered                   | [24] |
| bulk                 | 9       | 25.7 | BK                                  | c-Si NP, $D_{NP} = 70\text{nm}$ , Spark plasma sintered                   | [25] |
| bulk                 | 4.8     | 21.8 | BK1                                 | c-Si NP, $D_{NP} = 60\text{nm}$ , Spark plasma sintered                   | [25] |
| bulk                 | 5.2     | 13.5 | BK                                  | c-Si NP, $D_{NP} = 40\text{nm}$ , Spark plasma sintered                   | [25] |
| bulk                 |         | 10   | LF                                  | c-Si NG, $D_{NP} = 5\text{-}20\text{nm}$ , dc hot pressed.                | [27] |
| bulk                 |         | 10   | Calculated from thermal diffusivity | c-Si NP, $D_{NP} = 5\text{-}1\text{-nm}$ , ball milled and sintered       | [28] |
| bulk                 | 17      | 6    | $3\omega$                           | Si NC, $D_{NP} = 64\text{nm}$                                             | [26] |
| <b>Si NW films</b>   |         |      |                                     |                                                                           |      |
| 30                   | 33 - 35 | 1.68 | Comsol simulation                   | c-Por-Si NWs, $D_{NW} = 20\text{-}200\text{nm}$ , met.assist.chem.etched  | [55] |
| 20                   | 50      | 0.29 | Raman-Fourier                       | D(beam) = 1 micron, c-Si NW, 50%, d=150nm, p-type, met.assist.chem.etched | [54] |
| 35                   | 50      | 0.25 | Raman-Fourier                       | D(beam) = 1 micron, c-Si NW, 50%, d=150nm, p-type, met.assist.chem.etched | [54] |
| 20                   | 50      | 0.54 | Raman-Fourier                       | D(beam) = 2 micron, c-Si NW, 50%, d=150nm, p-type, met.assist.chem.etched | [54] |
| 35                   | 50      | 0.36 | Raman-Fourier                       | D(beam) = 2 micron, c-Si NW, 50%, d=150nm, p-type, met.assist.chem.etched | [54] |
| 0.05                 | 43      | 0.33 | EBH                                 | c-Por-Si NWs, $D_{NW} = 8\text{nm}$ , etched                              | [56] |
| 20                   | 50-55   | 7.3  | PA                                  | c-Por-Si NWs, $D_{NW} = 100\text{nm}$ , p-type, met.assis.chemical etched | [53] |
| 35                   | 50-55   | 6.2  | PA                                  | c-Por-Si NWs, $D_{NW} = 100\text{nm}$ , p-type, met.assis.chemical etched | [53] |
| 50                   | 50-55   | 5.6  | PA                                  | c-Por-Si NWs, $D_{NW} = 100\text{nm}$ , p-type, met.assis.chemical etched | [53] |
